# Supplementary material for: A two-step field-induced magnetic transition in spin-canted systems observed only for the CoIIcoordination polymer
Source: Royal Society of Chemistry journal article supplement (doi:10.1039/b714678g), 2007-10-25
Supplement: b714678g.pdf [file b714678g.pdf]

## A two-step field-induced magnetic transition in spin-canted systems observed only for the Co<sup>II</sup> coordination polymer

Hong-Peng Jia, Wei Li, Zhan-Feng Ju and Jie Zhang\*

*State Key Laboratory of Structural Chemistry, Fujian Institute of Research on the Structure of Matter, Chinese Academy of Sciences, Fujian, Fuzhou, 350002, China.*

*Fax: 86 0591 83710051; E-mail: [zhangjie@fjirsm.ac.cn](mailto:zhangjie@fjirsm.ac.cn)*

### Materials, Methods, Syntheses and Characterizations

All chemicals employed for synthesis were obtained commercially. 2-Chloropyrimidine-4,6-dicarboxylic acid (H<sub>2</sub>cpdc) was synthesized by oxidizing 2-chloro-4,6-dimethylpyrimidine with KMnO<sub>4</sub> in aqueous solution according to the general experimental method.

Elemental analyses of C, H and N were carried out with a Vario EL III elemental analyzer. IR spectra were performed on a Spectrum One FT-IR spectrometer or Bomem BM102 FT-IR spectrometer with KBr pellets in the range 4000–400 cm<sup>-1</sup>. Magnetic susceptibilities were measured for **1** and **2** on polycrystalline samples with a Quantum Design PPMS-9T system. Diamagnetic corrections were made for the sample holder and sample.

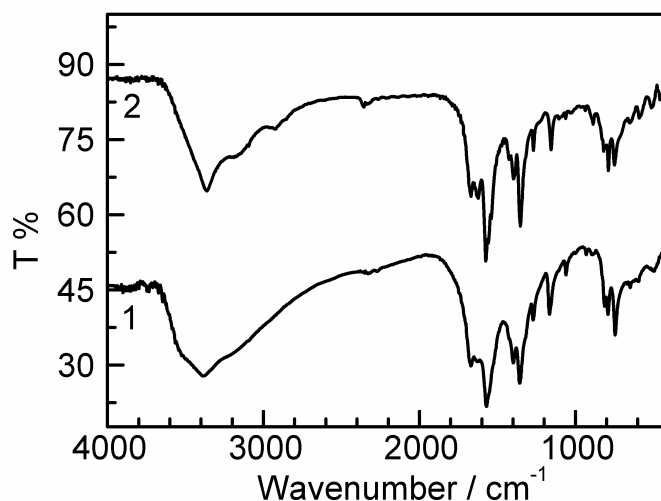

**Fig. S1.** IR spectra of **1** and **2**.

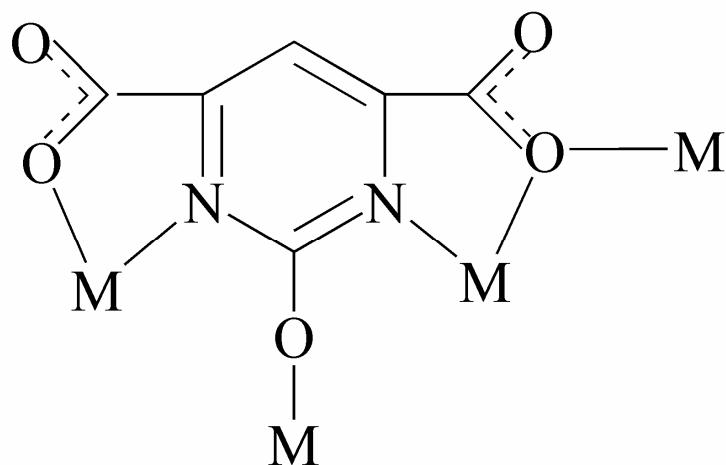

Fig S2.  $\mu_4$ -coordination mode of  $hpdc^{3-}$  in 1 and 2.

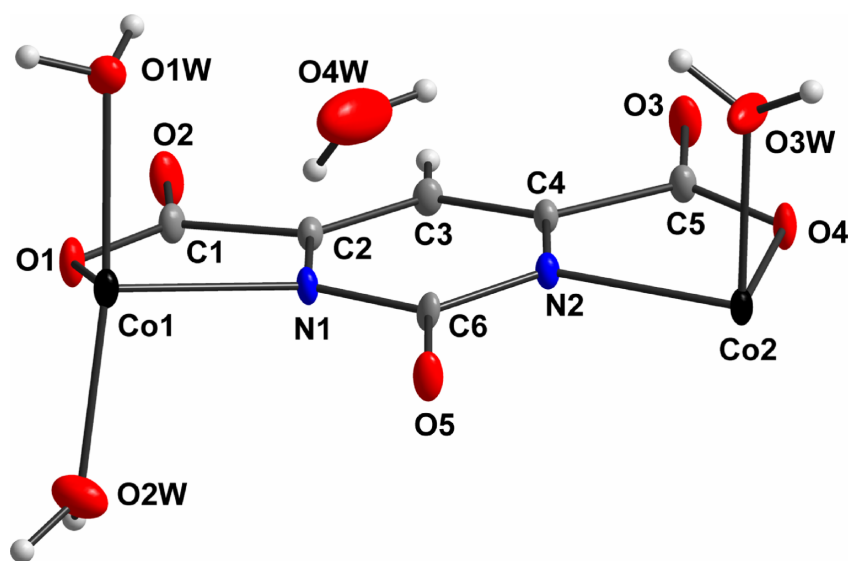

Fig. S3. Thermal ellipsoid plot showing the asymmetric unit of 2 with atom labeling (30% probability level).

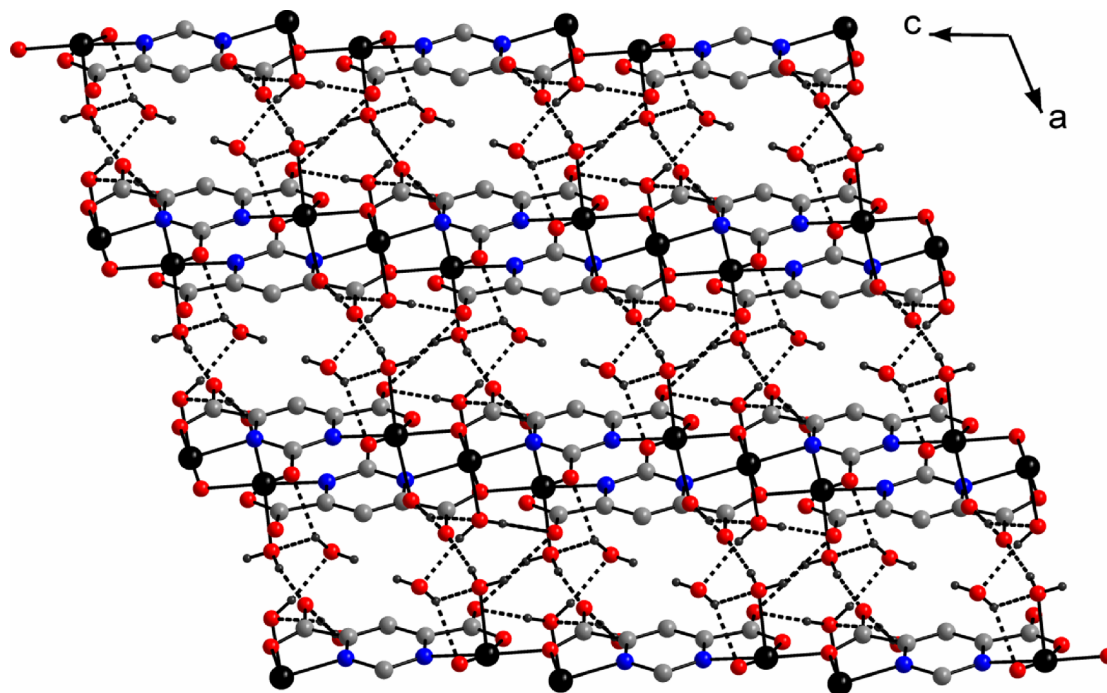

Fig. S4. 3D supramolecular network of **1** and **2** constructed by hydrogen bonds.

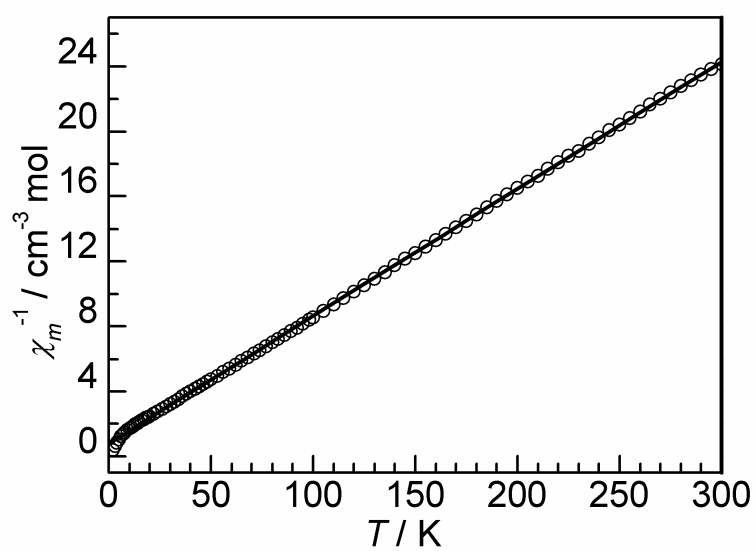

Fig. S5. Temperature dependence of  $\chi_m^{-1}(\circ)$  for **1**. The solid line is the best-fit according to the Curie-Weiss law.

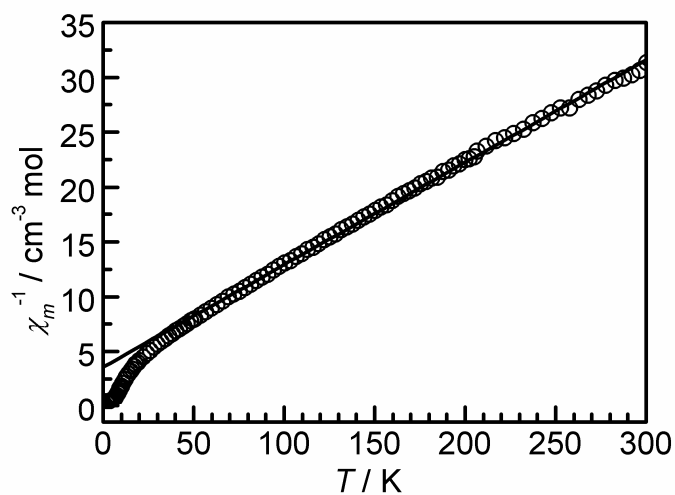

**Fig. S6.** Temperature dependence of  $\chi_m^{-1}(\circ)$  for **2**. The solid line is the best-fit according to the Curie-Weiss law.

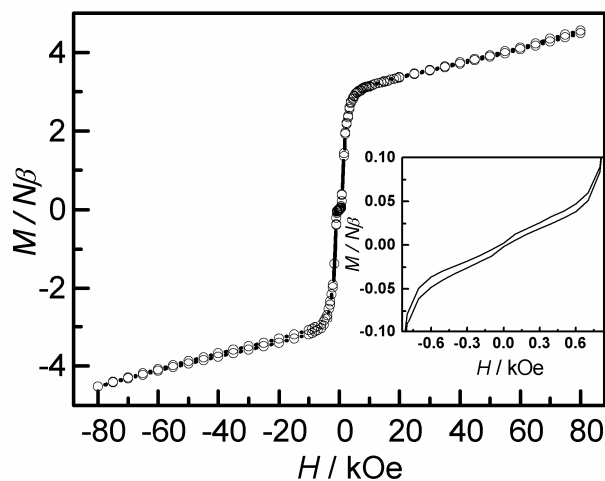

**Fig. S7.** Field dependence of the magnetizations of **2**. The inset gives a blow-up of the hysteresis loop.

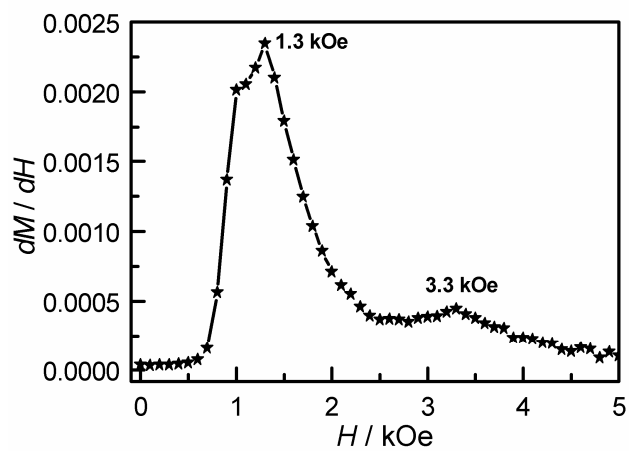

**Fig. S8.** The  $dM/dH$  derivative curve of **2** at 2 K.

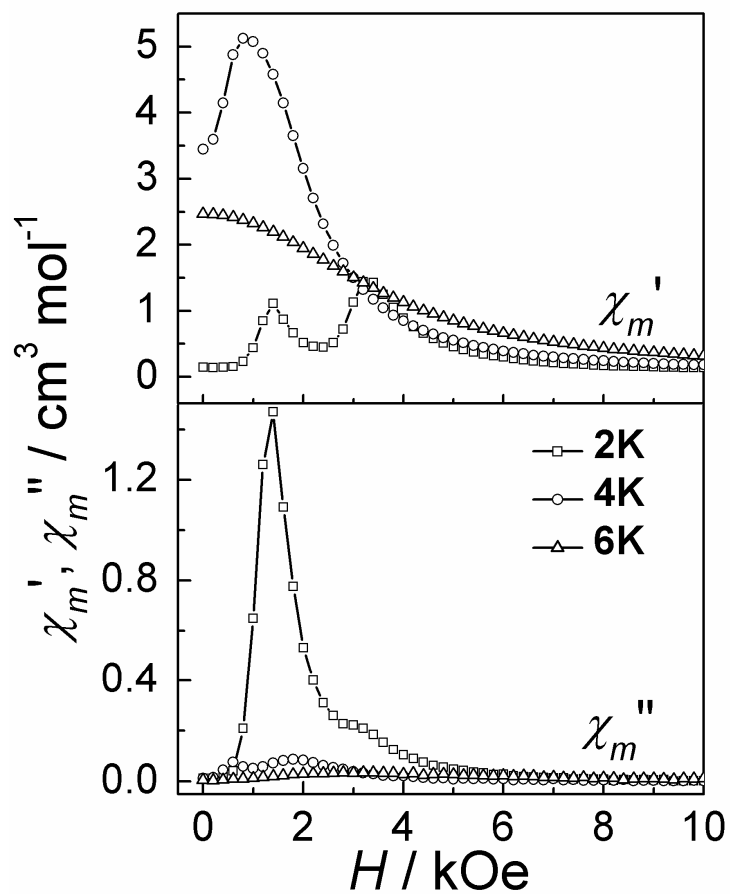

**Fig. S9.** Field-dependent *ac* magnetic susceptibilities of **2** measured at different temperatures.

**Table S1.** Hydrogen-bonding parameters in Compound **2**

| D   | H  | A   | Symmetry code    | D(D-H) (Å) | d(H..A) (Å) | d(D..A) (Å) | <DHA (°) |
|-----|----|-----|------------------|------------|-------------|-------------|----------|
| O1W | H1 | O3  | -x+1, -y+1, -z-1 | 0.805      | 1.963       | 2.752(4)    | 166.44   |
| O2W | H4 | O3  | -x, -y+1, -z-1   | 0.811      | 2.088       | 2.854(4)    | 157.61   |
| O3W | H7 | O2  | x, y-1, z-1      | 0.808      | 1.910       | 2.709(4)    | 169.88   |
| O3W | H6 | O4W | -x+1, -y+1, -z-1 | 0.808      | 1.948       | 2.753(4)    | 174.4    |
| O4W | H9 | O5  | -x, -y+1, -z-1   | 0.817      | 2.167       | 2.886(5)    | 146.90   |
